# Supplementary material for: Acute effect of combined exercise with aerobic and resistance exercises on executive function
Source: PeerJ. 2023 Aug 21;11:e15768. doi: 10.7717/peerj.15768 (PMC10448877; doi:10.7717/peerj.15768)
Supplement: Data S1 — Lactate, Heart Rate, and RPE were as the exercise intensity manipulation parameter. There were three time points: pre-intervention, during-intervention, and post-intervention. Stroop Color and Word Test was as the parameter for executive function. [file peerj-11-15768-s001.xlsx]

## Sheet: Stroop Color World Test
Research ID	CE_neutral_RT	CE_congruent_RT	CE_incongruent_RT	RE_neutral_RT	RE_congruent_RT	RE_incongruent_RT	SC_neutral_RT	SC_congruent_RT	SC_incongruent_RT	CE_neutral_%	CE_congruent_%	CE_incongruent_%	RE_neutral_%	RE_congruent_%	RE_incongruent_%	SC_neutral_%	SC_congruent_%	SC_incongruent_%
1	11.179	13.775	26.353	13.787	11.571	27.953	16.638	13.599	38.265	98	98	98	100	100	100	100	100	96
2	15.67	13.629	23.354	18.491	20.233	27.499	15.042	14.008	25.152	100	100	100	100	100	100	100	100	100
3	16.682	14.718	25.81	15.776	16.655	25.686	17.005	16.142	24.142	100	100	100	100	100	100	100	100	100
4	19.666	17.152	36.16	17.71	17.648	38.135	22.529	16.673	32.83	100	100	96	100	100	98	100	100	98
5	17.071	17.718	24.458	20.768	21.712	44.458	22.601	16.359	35.754	100	100	98	100	100	98	100	100	98
6	12.281	16.424	38.254	14.094	12.95	25.389	18.677	18.313	32.427	100	100	96	100	100	100	96	96	98
7	13.776	12.584	24.384	14.722	14.588	32.11	14.358	16.431	34.496	100	100	96	100	100	100	100	100	96
8	16.812	17.279	39.368	19.193	20.905	44.476	22.138	21.735	51.051	100	100	100	100	100	98	98	96	96
9	15.664	15.541	28.128	16.027	15.192	24.899	20.358	17.222	29.955	100	98	98	98	98	98	98	100	98
10	16.234	18.949	25.682	13.647	14.314	24.488	17.557	20.325	32.804	100	100	100	100	100	100	100	96	94
11	20.924	23.114	52.711	19.136	20.315	51.158	19.866	19.537	51.066	100	100	100	100	100	98	100	100	96
12	17.178	17.88	29.984	19.141	17.157	28.197	18.985	15.202	32.588	100	98	96	100	100	98	100	100	96
13	15.182	13.424	35.347	13.839	13.291	26.406	15.852	16.064	38.543	100	96	92	100	100	100	100	100	96
14	17.563	15.878	25.213	16.208	16.12	30.171	17.563	15.878	25.213	100	98	98	100	100	96	100	100	100
15	21.558	21.201	35.138	20.017	20.56	34.579	19.984	25.355	41.161	100	100	98	100	98	100	100	100	94

## Sheet: Lactate
Research ID	CE_Lactate_pre	CE_Lactate_during	CE_Lactate_post	RE_Lactate_pre	RE_Lactate_during	RE_Lactate_post	SC_Lactate_pre	SC_Lactate_during	SC_Lactate_post
1	1	5.7	8.6	1.3	7.8	6.7	2.6	1.1	1.4
2	1.4	5.4	7.5	1.3	8.4	6.6	1.2	2.3	1.5
3	1.8	5	7.4	1.1	5.1	4.4	1.5	1.4	1.5
4	1.4	6	10.4	1.7	4.5	5.7	0.7	1.3	1.4
5	1.3	4.7	4.8	1.1	5.5	5	2	1.2	1.1
6	0.8	5.5	6.9	1.4	6.2	5.8	2.5	2.1	1.5
7	1.3	6	7.5	1.2	7.6	7.1	1.2	1.2	1.2
8	1.4	6.3	5.8	1.4	6.1	5.7	1.4	1.4	1.7
9	2.4	7	6.2	0.8	5	3.8	0.8	0.6	0.9
10	1.6	6	5.6	2.3	4.7	4.6	1.7	2.1	1
11	2.3	6.4	8	1.1	5.4	8.3	0.6	0.7	1.8
12	1	4.5	7.5	1.5	4.5	3.2	1.6	2	1.3
13	1.2	4.3	6.2	1.4	4.4	2.2	1.4	1.4	0.6
14	1.1	1.6	7.8	1	6.3	5.3	1.1	1.6	0.9
15	1	3.5	7.7	1.1	5.6	2.8	0.7	1	1

## Sheet: HR
Research ID	CE_HR_pre	CE_HR_during	CE_HR_post	RE_HR_pre	RE_HR_during	RE_HR_post	SC_HR_pre	SC_HR_during	SC_HR_post
1	73	109.27	101	66	99.45	92	55	67.99	59
2	65	160.24	151	81	91.55	84	67	79.52	94
3	60	107.22	106	85	95.82	91	58	67.59	64
4	109	138.24	146	75	103.85	105	99	55.11	90
5	57	120.21	123	58	82.32	67	64	64.16	67
6	56	136.54	136	56	102.41	86	73	66.21	66
7	85	128.26	112	62	90.61	76	70	78.09	63
8	74	124.98	101	69	91.78	80	73	66.02	63
9	72	122.43	113	54	82.66	71	58	60.85	58
10	62	138.41	128	64	82.52	79	72	67.48	62
11	72	125.73	107	65	96.32	107	76	79.81	70
12	76	111.27	134	81	95.65	108	63	72.27	74
13	81	132.82	127	73	100.87	132	81	89.36	71
14	70	100.23	122	57	85.45	97	70	69.99	65
15	65	124.33	113	55	82.19	70	79	67.9	64

## Sheet: RPE
Research ID	CE_RPE_pre	CE_RPE_during	CE_RPE_post	RE_RPE_pre	RE_RPE_during	RE_RPE_post	SC_RPE_pre	SC_RPE_during	SC_RPE_post
1	7	12.55	9	6	11.44	6	6	7	6
2	6	11.5	6	8	11.74	6	6	6	6
3	6	11.02	9	6	9.72	8	6	6	6
4	6	12.26	12	6	10.8	7	6	6	6
5	6	12.15	10	6	13.73	11	7	7	7
6	6	15.34	13	6	13.29	6	6	6	6
7	7	15.52	13	8	13.64	8	7	6	7
8	6	14.22	12	6	14.07	11	8	6	6
9	6	12.69	11	6	9.87	7	6	7	6
10	6	13.14	10	7	12.51	9	6	6	6
11	6	14.11	12	6	15.04	12	6	6	7
12	6	12.86	16	6	13.08	10	6	7	6
13	6	11.78	9	7	10.81	11	6	6	7
14	7	13.35	10	6	15.03	13	6	6	7
15	6	14.55	10	6	13.66	8	6	6	6
