# Supplementary material for: Acute effect of combined exercise with aerobic and resistance exercises on executive function
Source: PeerJ. 2023 Aug 21;11:e15768. doi: 10.7717/peerj.15768 (PMC10448877; doi:10.7717/peerj.15768)
Supplement: Supplemental Information 2 — Includes: age, sex, body weight, muscle mass, fat mass, etc. [file peerj-11-15768-s002.xlsx]

## Sheet: Participant Raw Data
Research ID	Gender	Age	Height (c.m.)	Weight (k.g.)	BMI (kg / m*m)	Muscle Mass (k.g.)	Fat mass (k.g.)	Body fat percentage (%)	VO2peak （absolute）	VO2peak （relative）	65%Watt	Bench Press （kg）	70% Bench Press （kg）	Bent-over row（kg）	70% Bent-over row （kg）	Dumbbell Lateral raise（kg）	70% Dumbbell Lateral raise（kg）	Dumbbell Biceps Curl （kg）	70% Dumbbell Biceps Curl （kg）
1	Male	23	170	64.1	22.1799	29.7	11.1	17.4	3047.28	47.5394	134.458	27.5	19.25	45	31.5	7	4.9	9	6.3
2	Male	24	172	67.4	22.7826	32.5	10.8	16	3049.79	45.2491	134.589	70	49	70	49	12.5	8.75	12.5	8.75
3	Male	24	168.6	63.7	22.4091	28.3	13.3	20.9	2879.14	45.1984	125.715	35	24.5	45	31.5	8	5.6	7	4.9
4	Male	23	168.5	82.6	29.0924	31	27.6	33.5	2536.69	30.7105	107.908	40	28	60	42	7	4.9	9	6.3
5	Male	25	172.1	63.8	21.5407	30.8	10.3	16	3026.93	47.444	133.4	40	28	35	24.5	8	5.6	10	7
6	Male	21	177.9	75	23.6979	34.9	13.4	17.9	4243.56	56.5808	196.665	50	35	50	35	10	7	10	7
7	Male	24	172.2	64.6	21.7854	31.3	9.3	14.4	2884.85	44.6571	126.012	50	35	50	35	10	7	10	7
8	Male	23	176.8	86.9	27.8007	38.1	20.4	23.4	3509.89	40.39	158.514	60	42	60	42	12.5	8.75	10	7
9	Male	24	190.3	96.7	26.7023	49.3	11.5	11.9	4192.23	43.353	193.996	80	56	90	63	12.5	8.75	15	10.5
10	Male	24	178.7	89	27.8703	43.1	14.8	16.6	4616.29	51.8684	216.047	80	56	80	56	12.5	8.75	17.5	12.25
11	Male	34	164	65	24.1672	26.1	18	27.7	2309.54	35.5314	96.096	30	21	30	21	5	3.5	7	4.9
12	Male	32	165.5	74.6	27.236	28.6	23.3	31.2	2549.13	34.1706	108.554	20	14	30	21	3	2.1	5	3.5
13	Male	24	170	64.3	22.2491	31.8	8.2	12.7	3198.24	49.7394	142.309	50	35	50	35	9	6.3	8	5.6
14	Male	23	178	80	25.2493	37	15	18.8	3150.78	39.3848	139.841	50	35	50	35	8	5.6	10	7
15	Male	23	173.9	67.6	22.3536	32.9	9.5	14.1	3387.34	50.1086	152.14	60	42	60	42	8	5.6	10	7
